# Supplementary material for: The elemental mechanism of transcriptional pausing
Source: eLife. 2019 Jan 8;8:e40981. doi: 10.7554/eLife.40981 (PMC6336406; doi:10.7554/eLife.40981)
Supplement: Figure 2—source data 1. [file elife-40981-fig2-data1.xlsx]

## Sheet: Sheet1
Source data for Figure 2D and Figure 2—figure supplement 1 .Fraction C17 pause RNA for wild-type and mutant pause signals.
	Fraction C17 pause RNAP and standard deviation in replicates (n≥3)
Time (s)	WT-consensus	sd-wt	usFJ	sd-usFJ	Hyb	sd-Hyb	dsFJ	sd-dsFJ	dsDNA	sd-dsDNA	usFJ-Hyb	sd-usFJ-Hyb	usFJ-dsFJ	sd-usFJ-dsFJ	usFJ-dsDNA	sd-usFJ-dsDNA	dsFJ-dsDNA	sd-dsFJ-dsDNA
5	0.81004	0.033746	0.39486	0.063101	0.76871	0.019687	0.55907	0.030974	0.49137	0.032989	0.6747	0.006351	0.4716	0.008608	0.54378	0.0078706	0.53721	0.016635	0.4876	0.031598	0.15543	0.016946
10	0.73102	0.029786	0.19718	0.022899	0.6496	0.015129	0.35426	0.0068656	0.27871	0.025803	0.56009	0.0084222	0.29773	0.014719	0.43599	0.015233	0.35192	0.011636	0.33068	0.017085	0.069232	0.0068212
15	0.64133	0.03081	0.10185	0.015937	0.54643	0.020978	0.23322	0.010065	0.16682	0.010002	0.47833	0.0062031	0.20613	0.012009	0.3521	0.0067821	0.23445	0.011305	0.24092	0.0060435	0.041955	0.0049587
30	0.4628	0.032419	0.032938	0.0074333	0.36747	0.017761	0.10148	0.00080056	0.075925	0.0033818	0.33542	0.0068251	0.10788	0.0058778	0.23436	0.0047556	0.10984	0.0055405	0.14815	0.0031478	0.020479	0.0031998
45	0.33642	0.033297	0.012641	0.0026495	0.25451	0.0058639	0.056869	0.001076	0.046151	0.0048633	0.25635	0.0079231	0.072083	0.0038201	0.18498	0.0056302	0.060999	0.0036028	0.11444	0.0021066	0.014891	0.0029212
60	0.25009	0.026781	0.0076855	0.0015341	0.18604	0.010753	0.039383	0.0020466	0.031973	0.0023157	0.20801	0.0051759	0.053983	0.0038505	0.1495	0.0046239	0.043921	0.0040612	0.091306	0.0032759	0.011034	0.0027877
120	0.11677	0.023015	0.0021517	0.00042398	0.088569	0.0092289	0.017125	0.0028765	0.017025	0.0026323	0.1294	0.0077756	0.029653	0.0025636	0.093009	0.0099873	0.021162	0.0050862	0.051249	0.0027594	0.0053086	0.0021916
240	0.055325	0.013591	0.0026652	0.0029837	0.051111	0.0042939	0.0086169	0.0021707	0.010287	0.0010593	0.07446	0.0054031	0.016851	0.0022011	0.050887	0.0075674	0.0098832	0.003457	0.030922	0.0061621	0.0024303	0.0022099
