# Supplementary material for: The elemental mechanism of transcriptional pausing
Source: eLife journal article supplement (doi:10.7554/elife.40981), 2019-01-07
Supplement: supp [file elife-40981-supp-v1.zip]

# Supplementary file 1. Oligonucleotides and plasmids used in this study.

| Oligonucleotides                                                                                                   | Source           | Lab Stock # |
|--------------------------------------------------------------------------------------------------------------------|------------------|-------------|
| ePEC non-template DNA (consensus)<br>GGTCAGTACGTCCGGCATAGTTGCGCCCGTAAATTCAGATCTTCC<br>AGTGG                        | IDT              | #9563       |
| ePEC non-template DNA (bubble scaffold)<br>GGTCAGTACGTCCGGTTCGATCTTCGCCCGTAAATTCAGATCTTCC<br>AGTGG                 | IDT              | #8333       |
| ePEC template DNA (consensus)<br>CCACTGGAAGATCTGAATTTACGGGCGCAACTATGCCGGACGTA<br>CTGACC                            | IDT              | #8334       |
| ePEC RNA -11G (consensus)<br>UUUUUUUGCAUAGUU                                                                       | IDT              | #8342       |
| ePEC RNA -11U<br>UUUUUUUGCAUAGUU                                                                                   | IDT              | #10797      |
| ePEC non-template DNA (Bochkareva <i>et al.</i> , 2012)<br>ACTTACAGTAATCCGAAGTACACACGGCGAATAGCCA                   | IDT              | #8195       |
| ePEC template DNA (Bochkareva <i>et al.</i> , 2012)<br>TGGCTATTCGCCGTGTGTACTTCGGATTACTGTAAGT                       | IDT              | #8196       |
| ePEC non-template long DNA (Bochkareva <i>et al.</i> , 2012)<br>ACTTACAGTAATCCGAAGTACACACGGCGAATAGCCATTCCAGTG<br>G | IDT              | #8289       |
| ePEC template long DNA (Bochkareva <i>et al.</i> , 2012)<br>CCACTGGAATGGCTATTCGCCGTGTGTACTTCGGATTACTGTAAG<br>T     | IDT              | #8290       |
| ePEC RNA (Bochkareva <i>et al.</i> , 2012)<br>AAUAAUCCGAAGU                                                        | IDT              | #7974       |
| ePEC tandem scaffold non-template DNA<br>GGTACCGGCATAGTTGCGCCCGCAAAGATGCGCCCGTAAATTC<br>AGATCTTCCAGTGG             | IDT              | #12623      |
| ePEC tandem scaffold template DNA<br>CCACTGGAAGATCTGAATTTACGGGCGCATCTTTGCCGGGCGCA<br>ACTATGCCGGTACC                | IDT              | #12624      |
| EC non-template DNA for DS-6MI control<br>GGTGATCTAAGGTTCCAGAGGAGCGTTCATGTCAGTAGAGTAGC<br>GAGTGG X=6-MI            | Fidelity Systems | #11159      |
| EC template DNA for DS-6MI control<br>CCACTCGCTACTCTACTGACATGACCGCTCCTCTGGAACCTTAGA<br>TCACC                       | IDT              | #11242      |
| EC RNA for DS-6MI control<br>CUCACAACCAGAGGAG                                                                      | IDT              | #8106       |
| ePEC non-template DNA for DS-6MI pause<br>GGTCAGTACGTCCGGCATAGTTGCGTTCGTAAATTCAGATCTTCC<br>AGTGG                   | Fidelity Systems | #11156      |

|                                                                                                     |                  |        |
|-----------------------------------------------------------------------------------------------------|------------------|--------|
| ePEC template DNA for DS-6MI pause<br>CCACTGGAAGATCTGAATTTACGACCGCAACTATGCCGGACGTAC<br>TGACC        | IDT              | #11241 |
| ePEC RNA for DS-6MI pause<br>UUUUUUGGCAUAGUUG                                                       | IDT              | #8401  |
| ePEC non-template DNA for US-6MI control<br>ACTTGTAGCGATCTAAGGTTCCAGAGGAGCGGTCATGTCAGTAGA<br>GTAGC  | IDT              | #8102  |
| ePEC template DNA for US-6MI control<br>GCTACTCTACTGACATGACCGCTCCTCTGAACCTTAGATCGCTA<br>CAAGT       | Fidelity Systems | #8110  |
| ePEC non-template DNA for US-6MI pause<br>GGTCAGTACGTCCGCCATAGTTGCGCCCGTAAATTCAGATCTTCC<br>AGTGG    | IDT              | #8399  |
| ePEC template DNA for US-6MI pause<br>CCACTGGAAGATCTGAATTTACGGGCGCAACTATGCGGACGTA<br>CTGACC         | Fidelity Systems | #8385  |
| ePEC RNA for US-6MI pause<br>UUUUUUGGCAUAGUUG                                                       | IDT              | #8402  |
| ePEC template DNA (usFJ variant)<br>CCACTGGAAGATCTGAATTTACGGGCGCAACTATGGCGGACGTA<br>CTGACC          | IDT              | #9762  |
| ePEC RNA (usFJ variant)<br>UUUUUUGGCAUAGUU                                                          | IDT              | #8763  |
| ePEC template DNA (Hyb variant)<br>CCACTGGAAGATCTGAATTTACGGGCGCGAGTATGCCGGACGTA<br>CTGACC           | IDT              | #11639 |
| ePEC RNA (Hyb variant)<br>UUUUUUGGCAUACUC                                                           | IDT              | #11640 |
| ePEC non-template DNA (dsFJ variant)<br>GGTCAGTACGTCCGGCATAGTTGTGCCCGTAAATTCAGATCTTCC<br>AGTGG      | IDT              | #10806 |
| ePEC non-template DNA (DSDNA variant)<br>GGTCAGTACGTCCGGCATAGTTGCGGTCGTAAATTCAGATCTTCC<br>AGTGG     | IDT              | #11178 |
| ePEC template DNA (DSDNA variant)<br>CCACTGGAAGATCTGAATTTACGACCGCAACTATGCCGGACGTAC<br>TGACC         | IDT              | #11241 |
| ePEC template DNA (usFJ+Hyb variant)<br>CCACTGGAAGATCTGAATTTACGGGCGCGAGTATGGCGGACGTA<br>CTGACC      | IDT              | #11951 |
| ePEC RNA (usFJ+Hyb variant)<br>UUUUUUGGCAUACUC                                                      | IDT              | #11952 |
| ePEC non-template DNA (usFJ+dsFJ variant)<br>GGTCAGTACGTCCGCCATAGTTGTGCCCGTAAATTCAGATCTTCC<br>AGTGG | IDT              | #11533 |

|                                                                                                          |     |        |
|----------------------------------------------------------------------------------------------------------|-----|--------|
| ePEC non-template DNA (usFJ+DSDNA variant)<br>GGTCAGTACGTCCGCCATAGTTGCGGTCGTAAATTCAGATCTTCC<br>AGTGG     | IDT | #11534 |
| ePEC template DNA (usFJ+DSDNA variant)<br>CCACTGGAAGATCTGAATTTACGACCGCAACTATGGCGGACGTAC<br>TGACC         | IDT | #11535 |
| ePEC non-template DNA (Hyb+DSDNA variant)<br>GGTCAGTACGTCCGGCATAGTTGCGGTCGTAAATTCAGATCTTCC<br>AGTGG      | IDT | #11178 |
| ePEC non-template DNA (dsFJ+DSDNA variant)<br>GGTCAGTACGTCCGGCATAGTTGTGGTCGTAAATTCAGATCTTCC<br>AGTGG     | IDT | #11537 |
| ePEC non-template DNA (Double usFJ variant)<br>GGTCAGTACGTCCGTCATAGTTGCGCCCGTAAATTCAGATCTTCC<br>AGTGG    | IDT | #10800 |
| ePEC template DNA (Double usFJ variant)<br>CCACTGGAAGATCTGAATTTACGGGCGCAACTATGACGGACGTA<br>CTGACC        | IDT | #10801 |
| ePEC RNA (Double usFJ variant)<br>UUUUUUUUCAUAGUU                                                        | IDT | #10798 |
| <i>his</i> PEC1 non-template DNA<br>GCGTCCTATCGATCTTCGGAAGAGATTCAGAG                                     | IDT | #10924 |
| <i>his</i> PEC1 template DNA<br>CTCTGAATCTCTTCCAGCACACATCAGGACGC                                         | IDT | #10919 |
| <i>his</i> PEC1 RNA (pause -2 RNA)<br>UCAUCCGGCGAUGUGUG                                                  | IDT | #6593  |
| <i>his</i> PEC1 exit-channel duplex RNA<br>CCGGAUGA                                                      | IDT | #6594  |
| Control EC2, <i>his</i> PEC2 non-template DNA<br>GGTCAGTACGTCCTGTTCGATCTTCGGAAGAGAATTCAGATCTTCC<br>AGTGG | IDT | #8847  |
| Control EC2 template DNA<br>CCACTGGAAGATCTGAATTCTCTTCCCCTCTAGCTCAGGACGTAC<br>TGACC                       | IDT | #8848  |
| Control EC2 RNA<br>UUUUUUUGAGCUAGAGG                                                                     | IDT | #8855  |
| <i>his</i> PEC2 template DNA<br>CCACTGGAAGATCTGAATTCTCTTCCAGCACACATCAGGACGTAC<br>TGACC                   | IDT | #8851  |
| <i>his</i> PEC2 RNA (pause RNA)<br>CCUGACUAGUCUUUCAGGCGAUGUGUGCU                                         | IDT | #4865  |

| Plasmids                                                                                                                                                                                                                                                 | Source                          | Lab Stock # |
|----------------------------------------------------------------------------------------------------------------------------------------------------------------------------------------------------------------------------------------------------------|---------------------------------|-------------|
| pRM756<br>RNAP( $\alpha_2\beta\beta'\omega$ ) overexpression plasmid. His10-ppx tag at <i>rpoC</i> -C-terminus                                                                                                                                           | Windgassen <i>et al.</i> , 2014 | #2956       |
| pRM843<br>RNAP( $\alpha_2\beta\beta'\omega$ ) overexpression plasmid. HMK-Strep tag at <i>rpoC</i> -C-terminus, <i>rpoB</i> -His10-ppx.                                                                                                                  | Hein <i>et al.</i> , 2014       | #5143       |
| pRM1151<br>Derivative of pRM843. RNAP( $\alpha_2\beta\beta'\omega$ ) overexpression plasmid containing <i>rpoB</i> substitution R542A.                                                                                                                   | This work                       | #5451       |
| pRM 1147<br>Derivative of pRM756. RNAP( $\alpha_2\beta\beta'\omega$ ) overexpression plasmid containing <i>rpoC</i> substitution K334A                                                                                                                   | This work                       | #5447       |
| pDJ115<br>RNAP( $\alpha_2\beta\beta'\omega$ ) overexpression plasmid containing $\beta'$ substitutions I937C- P1139C with His <sub>10</sub> and HMK tags at $\beta'$ C-terminus                                                                          | Nayak <i>et al.</i> , 2013      | #4954       |
| pDJ116<br>RNAP( $\alpha_2\beta\beta'\omega$ ) overexpression plasmid containing $\beta'$ substitutions I937C- T1135C with His <sub>10</sub> and HMK tags at $\beta'$ C-terminus                                                                          | Nayak <i>et al.</i> , 2013      | #4955       |
| pDJ124<br>RNAP( $\alpha_2\beta\beta'\omega$ ) overexpression plasmid containing $\beta'$ substitution I937C- Q736C with His <sub>10</sub> and HMK tags on the $\beta'$ C-terminus                                                                        | Nayak <i>et al.</i> , 2013      | #4963       |
| pDJ129<br>RNAP( $\alpha_2\beta\beta'\omega$ ) overexpression plasmid containing $\beta'$ substitution I937C- G687C with His <sub>10</sub> and HMK tags on the $\beta'$ C-terminus                                                                        | Nayak <i>et al.</i> , 2013      | #4968       |
| pRM950<br>RNAP( $\alpha_2\beta\beta'\omega$ ) overexpression plasmid containing substitutions $\beta'$ 258iC, $\beta'$ 1045iC, and $\beta'$ 843C. HMK-Strep tag at $\beta'$ C-terminus, His <sub>10</sub> -precision protease tag at $\beta$ N-terminus. | Kang <i>et al.</i> , 2018a      | #5250       |
| pRM918<br>RNAP( $\alpha_2\beta\beta'\omega$ ) overexpression plasmid containing substitutions $\beta'$ 258iC. $\beta'$ 1044C. HMK-Strep tag at $\beta'$ C-terminus, His <sub>10</sub> -precision protease tag at $\beta$ N terminus                      | Hein <i>et al.</i> , 2014       | #5218       |

X , 6-Methylisoxanthopterin.
