# Supplementary material for: The elemental mechanism of transcriptional pausing
Source: eLife journal article supplement (doi:10.7554/elife.40981), 2019-01-07
Supplement: supp [file elife_poa_e40981_Figure_7_source_data_1.xlsx]

## Sheet: Sheet1
Source data for Figure 2D and Figure 2—figure supplement 1 .Fraction C17 pause RNA for wild-type and mutant pause signals.
	Fraction C17 pause RNAP and standard deviation in replicates (n≥3)
pause signal:	Consensus			Double usFJ			dsFJ-DSDNA
time (s)	WT (n=6)	R542A (n=3)	K334A (n=3)	WT (n=6)	R542A (n=3)	K334A (n=3)	WT (n=6)	R542A (n=3)	K334A (n=3)
5	0.861878	0.790186	0.865357	0.609913	0.296587	0.53946	0.388344	0.193955	0.342345
10	0.839398	0.715762	0.842437	0.456194	0.126938	0.343062	0.222129	0.102572	0.227137
15	0.79144	0.620722	0.792589	0.331447	0.0662733	0.217126	0.148952	0.0746923	0.180358
30	0.670548	0.429527	0.669308	0.16458	0.0209939	0.086329	0.0823221	0.0506137	0.135637
45	0.565274	0.30877	0.565134	0.0855794	0.0118421	0.0473584	0.0573329	0.0407763	0.112028
60	0.483828	0.223633	0.47551	0.0548594	0.00859579	0.0304863	0.0477654	0.0345519	0.0980345
120	0.296206	0.111893	0.291856	0.0192417	0.00545127	0.0146513	0.0350488	0.0220709	0.069224
240	0.154607	0.0694436	0.172455	0.009528	0.00383697	0.00985204	0.0253291	0.0140921	0.0486825
	s.d. for Fraction C17 pause RNA
pause signal:	Consensus			Double usFJ			dsFJ-DSDNA
time (s)	WT (n=6)	R542A (n=3)	K334A (n=3)	WT (n=6)	R542A (n=3)	K334A (n=3)	WT (n=6)	R542A (n=3)	K334A (n=3)
5	0.0183202	0.0163154	0.0105746	0.0156421	0.0155612	0.0162655	0.0174695	0.00204409	0.0109018
10	0.00686076	0.0052746	0.0123095	0.00895192	0.0103053	0.0125026	0.00740134	0.00341065	0.00518265
15	0.0114597	0.00592787	0.0112326	0.00547778	0.00369716	0.0126963	0.00552069	0.000645774	0.00316369
30	0.00883669	0.00586794	0.0181355	0.00508781	0.00108461	0.0120314	0.00330541	0.0016974	0.00441114
45	0.012956	0.00147585	0.0209148	0.00335659	0.000733429	0.0103719	0.00506285	0.00302443	0.00278568
60	0.0101698	0.00629499	0.0191757	0.00649788	0.00113818	0.00616388	0.0037475	0.000627976	0.00222125
120	0.00934919	0.00612271	0.0138326	0.00478911	0.000933513	0.00907429	0.0026122	0.000665714	0.0024907
240	0.00825467	0.00140776	0.0128172	0.00365347	0.00345511	0.00155081	0.00246498	0.00124761	0.00187366
